# Supplementary material for: GH20 and GH84 β-N-acetylglucosaminidases with different linkage specificities underpin mucin O-glycan breakdown capability of Bifidobacterium bifidum
Source: PubMed Central journal article supplement (PMC10245121; doi:10.1016/j.jbc.2023.104781), 2023-05-03
Supplement: mmc2.pdf [file mmc2.pdf]

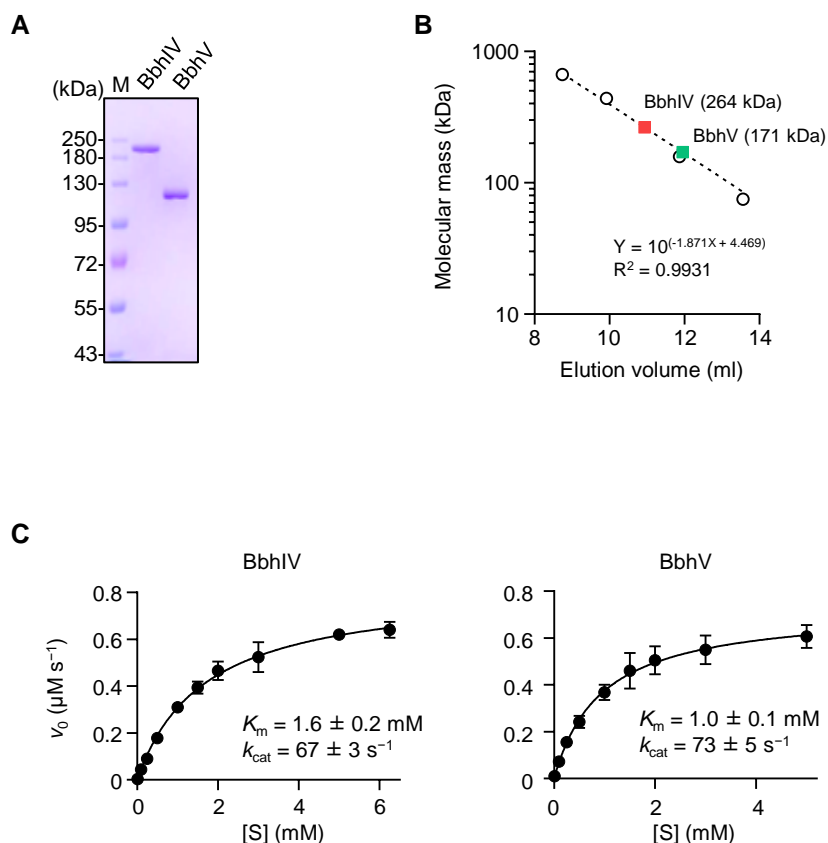

**Supporting Information Fig. S1. Characterization of recombinant BbhIV and BbhV from *B. bifidum*.** (A) The results of SDS-PAGE of purified recombinant BbhIV and BbhV proteins. One  $\mu\text{g}$  of each protein was loaded on a 7.5 % acrylamide gel. (B) Size-exclusion chromatography of BbhIV and BbhV for molecular size estimation. Thyroglobulin (669 kDa), ferritin (440 kDa), aldolase (158 kDa), and conalbumin (75 kDa) were used as molecular standards. (C)  $S_v$ -plots of the hydrolysis of *p*NP- $\beta$ -GlcNAc by BbhIV (left) and BbhV (right). Data are the mean  $\pm$  SD of three independent experiments. The kinetic parameters were calculated by curve-fitting the data to the Michaelis-Menten equation.

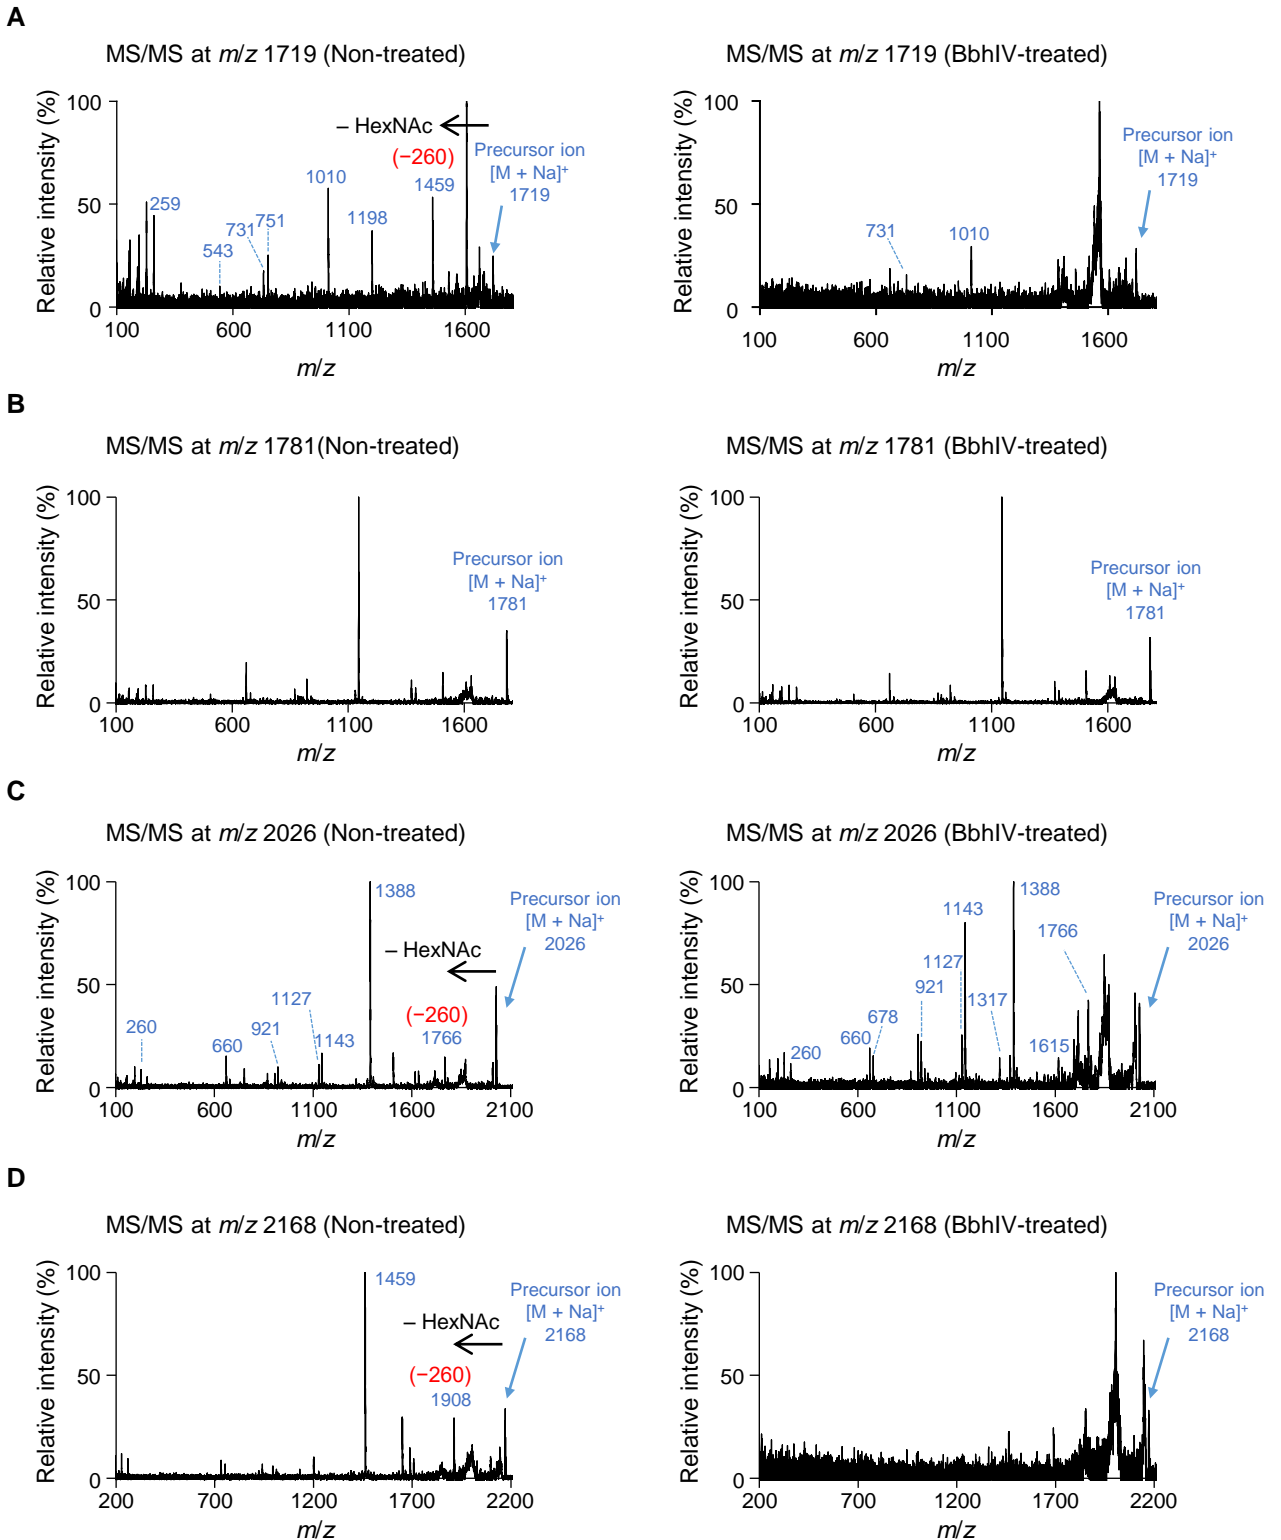

**Supporting Information Fig. S2. MS/MS spectra of the PGM *O*-glycan peaks whose estimated amounts were significantly changed upon BbhIV treatment.** Representative MS/MS spectra of  $m/z$  1719 (A), 1781 (B), 2026 (C), and 2168 (D) peaks obtained from the non-treated samples (left) and BbhIV-treated samples (right). Fragmentation of a precursor ion at the site with a terminal HexNAc linkage results in the decrease of 260 Da in MS.

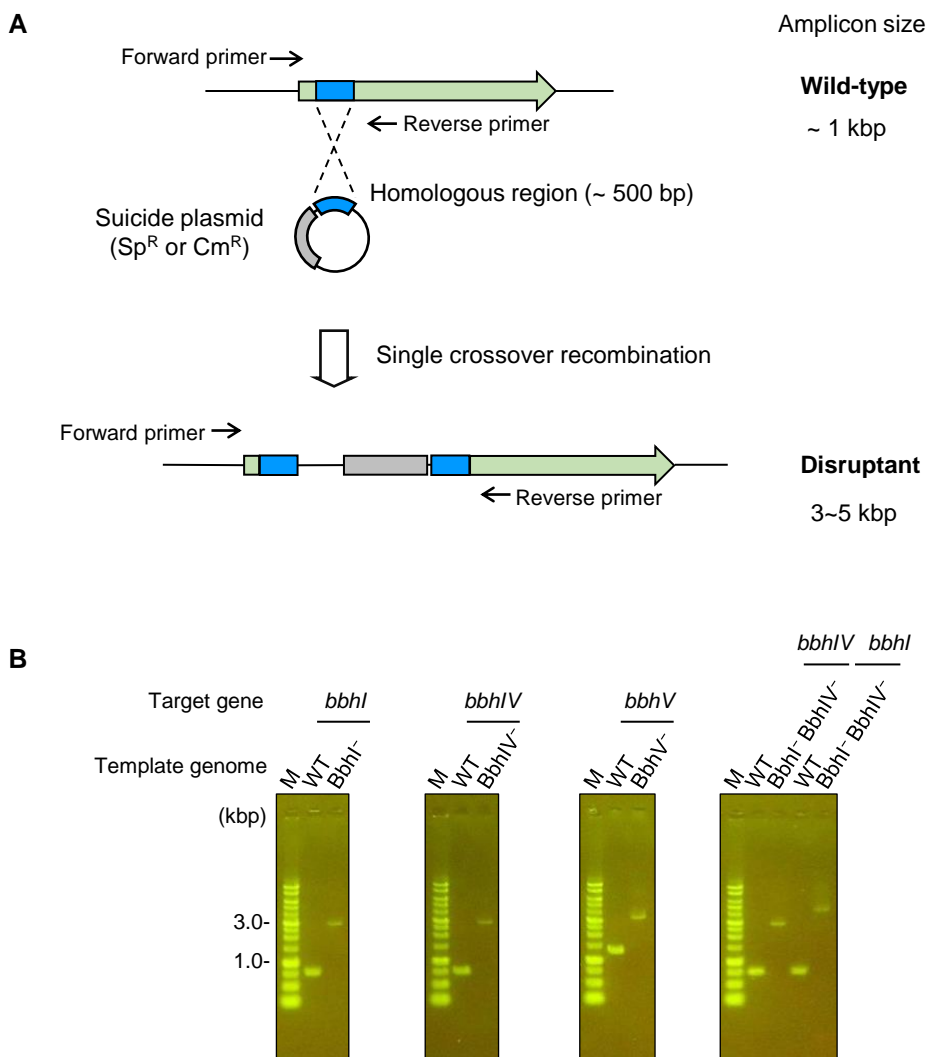

**Supporting Information Fig. S3. Disruption of the *bbhI*, *bbhIV*, and/or *bbhV* genes in the genome of *B. bifidum* JCM 1254.** (A) Schematic representation of a single crossover recombination event for targeted gene inactivation. The homologous regions (~ 500 bp) of *bbhI*, *bbhIV*, and *bbhV*, which were amplified from the genome, were inserted into a suicide plasmid [pMSK151 (Sp<sup>R</sup>) or pMSK207 (Cm<sup>R</sup>)] (see **Supporting Information Table S3**), and the resulting plasmids were introduced into *B. bifidum* by electroporation for targeted gene disruption. (B) The results of agarose-gel electrophoresis of the genomic PCR products. The genomes of WT, *BbhI*<sup>-</sup>, *BbhIV*<sup>-</sup>, *BbhV*<sup>-</sup>, and/or *BbhI*<sup>-</sup> *BbhIV*<sup>-</sup> strains were used as the templates. The primers used were designed to anneal to the positions outside of the regions used for recombination events.

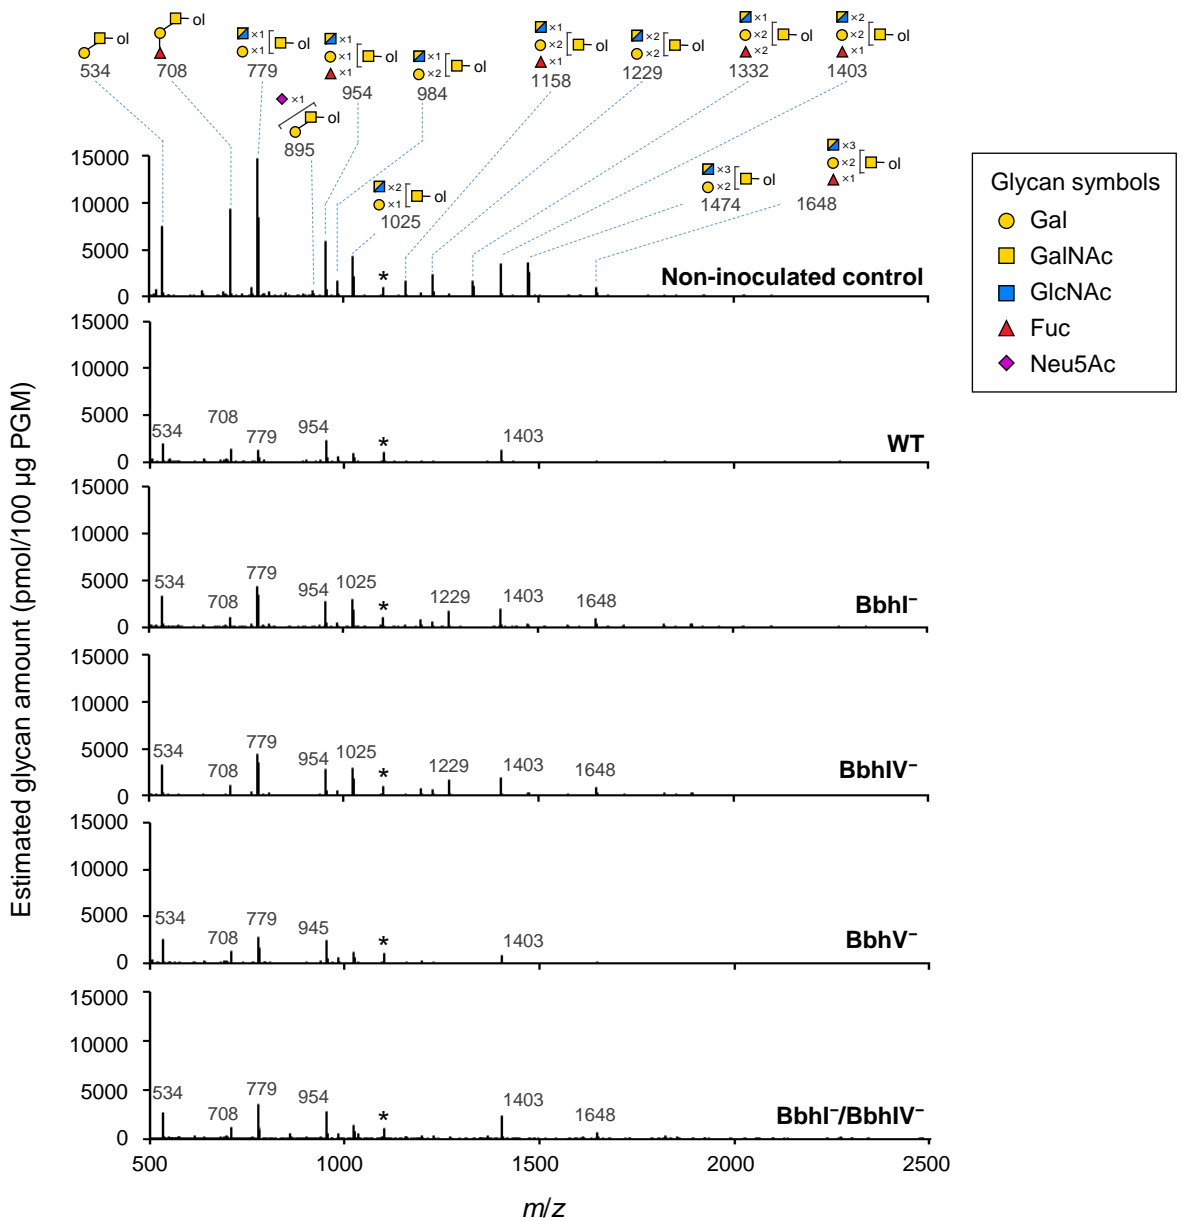

**Supporting Information Fig. S4. Full MS spectra of permethylated non-sulfated *O*-glycan alditols obtained from PGM incubated with *B. bifidum* variants.** Representative MS profiles of *O*-glycan alditols ( $m/z$  500–3000) obtained from PGM incubated with *B. bifidum* WT, BbhI<sup>-</sup>, BbhIV<sup>-</sup>, BbhV<sup>-</sup>, and BbhI<sup>-</sup> BbhIV<sup>-</sup> strains for 24 h. The MS spectrum obtained from non-inoculated control was also shown. Asterisks are the peak of lacto-*N*-fucopentaose I (LNFPI,  $m/z$  1100.6 [M + Na]<sup>+</sup>) added as an external control for the semi-quantification. See also **Supporting Information Table S2**. Glycan symbols are depicted according to the nomenclature committee of the Consortium for Functional Glycomics (73).

|                                      | WT | Bbhl <sup>-</sup> | BbhIV <sup>-</sup> | BbhV <sup>-</sup> | Bbhl <sup>-</sup> BbhIV <sup>-</sup> |
|--------------------------------------|----|-------------------|--------------------|-------------------|--------------------------------------|
| WT                                   |    | 0.1174            | 0.0025             | 0.9954            | 0.0027                               |
| Bbhl <sup>-</sup>                    |    |                   | 0.1503             | 0.0668            | 0.1641                               |
| BbhIV <sup>-</sup>                   |    |                   |                    | 0.0015            | >0.9999                              |
| BbhV <sup>-</sup>                    |    |                   |                    |                   | 0.0016                               |
| Bbhl <sup>-</sup> BbhIV <sup>-</sup> |    |                   |                    |                   |                                      |

**Supporting Information Fig. S5. *P* values of Tukey's multiple comparison test following one-way ANOVA in Fig. 3C.** Estimated total amounts of *O*-glycans obtained from PGM post-cultivation with *B. bifidum* variants were used for comparison, and *P* values obtained are shown. (See **Supporting Information Table S2** for glycan composition and semi-quantification). Data obtained in three independent experiments were used for the analysis.

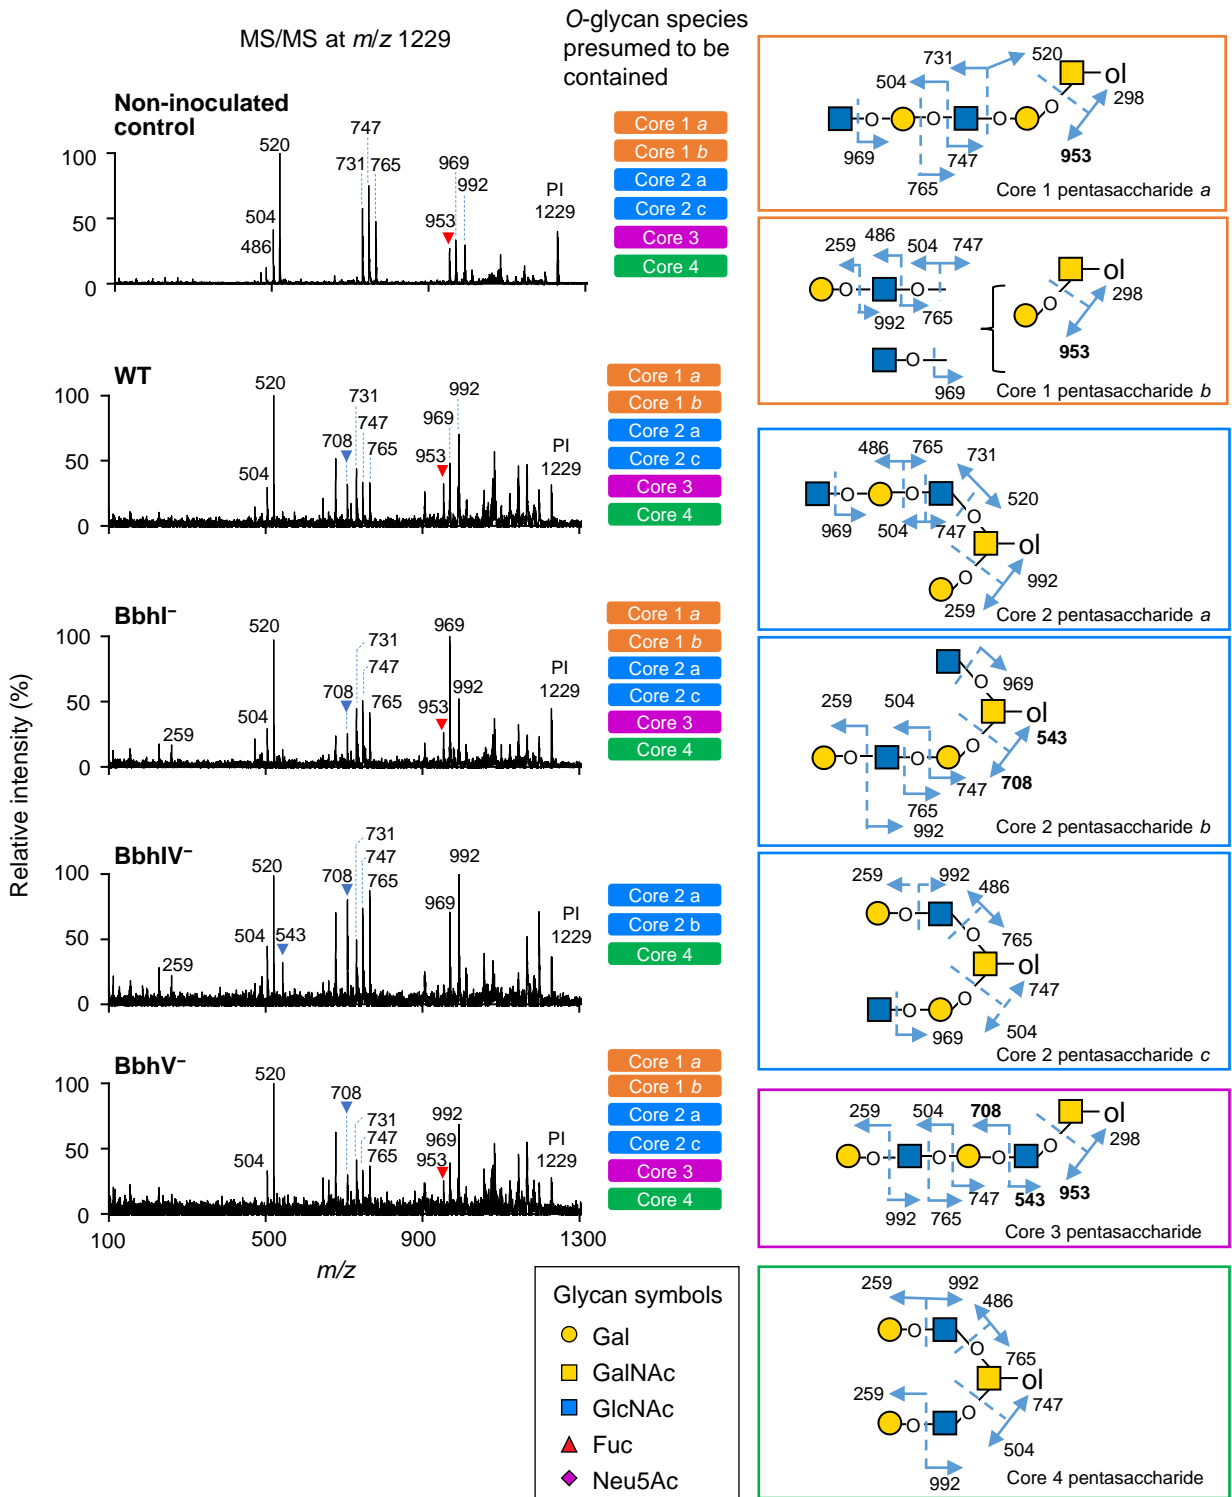

**Supporting Information Fig. S6. Different fragmentation patterns observed for the  $m/z$  1229 peaks obtained from PGM incubated with *B. bifidum* variants.** MS/MS spectra of the  $m/z$  1229 peaks (PI: precursor ion) obtained in *O*-glycomic analysis of PGM incubated with *B. bifidum* variants (see Fig. 3D) Isomeric pentasaccharide structures predicted from MS/MS fragmentation patterns are shown in the right panels with different core structures boxed with different colors. *O*-glycan species presumed to be contained in the precursor ions are shown in the right of MS/MS spectra. The Glycan symbols are depicted according to the nomenclature committee of the Consortium for Functional Glycomics (73).
